# Supplementary material for: A community based intervention program to enhance neighborhood cohesion: The Learning Families Project in Hong Kong
Source: PubMed Central journal article supplement (PMC5565197; doi:10.1371/journal.pone.0182722), 2017-08-21
Supplement: pone.0182722.s004.pdf [file pone.0182722.s004.pdf]

(To be filled by official):

Code: \_\_\_\_\_

Date: \_\_\_\_\_

## Learning Family Project Baseline Questionnaire Survey – T1

Name in Chinese: \_\_\_\_\_ Contact number: \_\_\_\_\_

Date: 2011/\_\_\_ (month)/\_\_\_ (day)

Please answer **all questions** of each part, the information you provided will be kept **strictly confidential**, and will be used for research analysis of this project only.

Note: Please clearly put a "✓" on the selected circle. For example:  ①  ②  ③

From which of the following source you get this questionnaire?

① Mail box   ② Mutual Aid Committee   ③ Block counter   ④ Synergis Management   ⑤ Housing Authority

⑥ Other, please specify: \_\_\_\_\_

### **Part 1: Family Harmony**

1 In general, I get along well with my family.

① Strongly agree

② Agree

③ Neutral/ No comments

④ Disagree

⑤ Strongly disagree

2 Do you think your family is harmonious? (Based on a 0-10 score , 0 is NOT AT ALL HARMONIOUS, 10 is VERY HARMONIOUS)

Score  (fill in a number)

### **Part 2: Family Role**

1 Are you satisfied or dissatisfied with the balance between your job and home life?

①

Yes

②

No

2. Number of family roles for which you were mostly or fully responsible, including: earning money to support the family; taking care of children; taking care of another household (for example: (maternal) grandparents)

①

1

②

2

③

3

④ 4 or above

### **Part 3: Family Communication**

1 In **the past 7 days**, how long have you spent on average per day to communicate or chat with your family?

Hour

Minute (fill in a number)

2 Do you think you have enough communication time with your family?

① Extremely enough

② Enough

③ Average

④ Not enough

⑤ Extremely not enough

### **Part 4: Interpersonal Relationships and Support**

1 How many friends do you feel at ease with, can talk to about private matters, or can call on for help?

(fill in a number)

2 How many family members do you feel at ease with, can talk to about private matters, or can call on for help?

(fill in a number)

Page 3

**Part 5: Social Support**

1 When you were sick, need help with household task, financial support, or get to the doctor, do you find it easy to seek for the help from family or friends?

- ① Very difficult    ② Difficult    ③ Average    ④ Easy    ⑤ Very Easy

2 How many people you are in regular contact (including family, relatives, friends & neighbours)?

(fill in a number)

In the **past ONE month**, how frequent you were in regular contact with the following persons?

At least once per day    At least once a week    At least once a month    Never

|                   |   |   |   |   |
|-------------------|---|---|---|---|
| 3 family members: | ① | ② | ③ | ④ |
| 4 relatives:      | ① | ② | ③ | ④ |
| 5 friends:        | ① | ② | ③ | ④ |
| 6 neighbours:     | ① | ② | ③ | ④ |

|                                           |                   |              |         |           |                |
|-------------------------------------------|-------------------|--------------|---------|-----------|----------------|
| Are you satisfied with...                 | Very dissatisfied | Dissatisfied | Average | Satisfied | Very satisfied |
| 7 support received from family members?   | ①                 | ②            | ③       | ④         | ⑤              |
| 8 support received from your relatives?   | ①                 | ②            | ③       | ④         | ⑤              |
| 9 support received from your friends?     | ①                 | ②            | ③       | ④         | ⑤              |
| 10 support received from your neighbours? | ①                 | ②            | ③       | ④         | ⑤              |

**Part 6: Neighbourhood Cohesion**

|                                                                            |                |       |         |          |                   |
|----------------------------------------------------------------------------|----------------|-------|---------|----------|-------------------|
|                                                                            | Strongly agree | Agree | Neutral | Disagree | Strongly disagree |
| 1 People around here are willing to help their neighbours.                 | ①              | ②     | ③       | ④        | ⑤                 |
| 2 This is a close-knit neighbourhood.                                      | ①              | ②     | ③       | ④        | ⑤                 |
| 3 People in this neighbourhood can be trusted.                             | ①              | ②     | ③       | ④        | ⑤                 |
| 4 People in this neighbourhood generally do not get along with each other. | ①              | ②     | ③       | ④        | ⑤                 |
| 5 People in this neighbourhood do not share the same values.               |                |       |         |          |                   |

**Part 7: Life Satisfaction Scale**

|                                                             |                   |          |         |       |                |
|-------------------------------------------------------------|-------------------|----------|---------|-------|----------------|
|                                                             | Strongly disagree | Disagree | Neutral | Agree | Strongly agree |
| 1 In most ways my life is close to my ideal.                | ①                 | ②        | ③       | ④     | ⑤              |
| 2 The conditions of my life are excellent.                  | ①                 | ②        | ③       | ④     | ⑤              |
| 3 I am satisfied with my life.                              | ①                 | ②        | ③       | ④     | ⑤              |
| 4 So far I have gotten the important things I want in life. | ①                 | ②        | ③       | ④     | ⑤              |

5 During the past half year, have you thought of quitting your job?    ① Yes    ② No    ③ Not applicable

6 Marital status:    ① Single    ② Married    ③ Cohabitation    ④ Divorced    ⑤ Separated    ⑥ Widowed

**If you are married, please answer the following two questions, if not, please go to Part 8**

|                                                                   |                   |          |         |       |                |
|-------------------------------------------------------------------|-------------------|----------|---------|-------|----------------|
|                                                                   | Strongly disagree | Disagree | Neutral | Agree | Strongly agree |
| 1 Our relationship is a perfect success.                          | ①                 | ②        | ③       | ④     | ⑤              |
| 2 I am very happy with how we handle role responsibilities in our | ①                 | ②        | ③       | ④     | ⑤              |

marriage.

**Part 8: Level of Happiness**

1 All things considered, would you say you are: ① Very Happy ② Happy ③ Not very happy ④ Not happy at all

2 Do you think your family is happy? (Based on a 0-10 score, 0 is NOT HAPPY, 10 is VERY HAPPY) Score  (fill in a number)

**Part 9: Level of Health**

1 In general, you think your health status is: ① Excellent ② Very good ③ Good ④ Fair ⑤ Bad

2 In physical health aspect:  
① Strongly unsatisfactory ② Very unsatisfactory ③ Unsatisfactory ④ Average ⑤ Satisfactory ⑥ Very satisfactory ⑦ Strongly satisfactory

3 In mental and psychological health aspect:  
① Strongly unsatisfactory ② Very unsatisfactory ③ Unsatisfactory ④ Average ⑤ Satisfactory ⑥ Very satisfactory ⑦ Strongly satisfactory

4 Do you think your family is healthy? (Based on a 0-10 score, 0 is NOT HEALTHY, 10 is VERY HEALTHY) Score  (fill in a number)

5. Do you smoke cigarettes?  
① No, I have never tried to smoke (↪ go to q8) ② No, I have quitted smoking for 6 months or below ③ No, I have quitted smoking for more than 6 months  
④ Yes, I smoke daily ⑤ Yes, I smoke occasionally

6. Are you thinking of quitting smoking? ① Yes (↪ continue with q7) ② No (↪ go to q8)

7. When do you want to quit smoking? (choose 1 only)  
① I have already stopped ② I will stop smoking today ③ I will stop within the next 7 days  
④ I will stop in the next 30 days ⑤ I will stop in the next 6 months ⑥ I will stop after 6 months or later

8. How frequent do you drink alcohol (e.g. 1 can of beer, 1 glass of house wine or 1 peg of liquor)?  
① Never ② Drink less than once a month ③ Drink 1 – 3 days a month ④ Drink 1 – 3 days a week  
⑤ Drink 4 – 6 days a week ⑥ Drink daily ⑦ Quitted ⑧ Only drink on special occasions

**Part 10: Learning with your family members\***

**(\*i.e. learning activities to be done with family members, such as outdoor activities, competitions, environmental education, family life education, interest groups, foreign language classes, etc.)**

1 Have you planned to have any learning activities with your family members in the coming half year?  
① Yes ② Considering ③ No

2 When do you plan to start the learning activities with your family? ① Coming 1-3months ② Coming 4-6 months ③ Not yet planned

**Part 11: Power, Participation and Resources in Community**

1 I can influence the decisions that this community makes. Strongly disagree ① Disagree ② Neutral ③ Agree ④ Strongly agree ⑤

- 2 By working together, people in my community can influence decisions that affect the community. ① ② ③ ④ ⑤
- 3 People in my community work together to influence decisions on the societal level. ① ② ③ ④ ⑤
- 4 I am satisfied with the amount of influence I have over decisions that affect my community. ① ② ③ ④ ⑤

- 5 How often do you participate in the activities held in your estate? ① Seldom ② Occasionally ③ Sometimes ④ Most of the time ⑤ Always
- 6 Do you have volunteer work? ① Yes ② No
- 7 Do you think the resources in your community are enough (such as transport facilities, recreation facility, shopping and leisure, etc.)? ① Enough ② Not enough
- 8 Have you used the service provided by the social service organization in your community? ① Yes ② No

**Part 12: Family Resilience Scale**

| My family and I think that...                          | Strongly agree | Agree | Slightly agree | Neutral | Slightly disagree | Disagree | Strongly disagree |
|--------------------------------------------------------|----------------|-------|----------------|---------|-------------------|----------|-------------------|
| 1 We all have input into major family decisions.       | ①              | ②     | ③              | ④       | ⑤                 | ⑥        | ⑦                 |
| 2 We can work through difficulties as a family.        | ①              | ②     | ③              | ④       | ⑤                 | ⑥        | ⑦                 |
| 3 We feel free to express our opinions.                | ①              | ②     | ③              | ④       | ⑤                 | ⑥        | ⑦                 |
| 4 We share responsibility in the family.               | ①              | ②     | ③              | ④       | ⑤                 | ⑥        | ⑦                 |
| 5 We ask neighbours for help and assistance.           | ①              | ②     | ③              | ④       | ⑤                 | ⑥        | ⑦                 |
| 6 We can depend upon people in this community.         | ①              | ②     | ③              | ④       | ⑤                 | ⑥        | ⑦                 |
| 7 We know there is community help if there is trouble. | ①              | ②     | ③              | ④       | ⑤                 | ⑥        | ⑦                 |
| 8 We know we are important to our friends.             | ①              | ②     | ③              | ④       | ⑤                 | ⑥        | ⑦                 |
| 9 We feel we are strong in facing big problems.        | ①              | ②     | ③              | ④       | ⑤                 | ⑥        | ⑦                 |

**Part 13: Family 3Hs – Health, Happiness and Harmony**

In the past 7 days, have you actively done the following(s) to increase the 3Hs (Health, Happiness and Harmony) in your family? (You can choose more than one)

|                                                                            | Yes                   | No                    |                                                                                                         | Yes                   | No                    |
|----------------------------------------------------------------------------|-----------------------|-----------------------|---------------------------------------------------------------------------------------------------------|-----------------------|-----------------------|
| a. Say thank you to family members                                         | <input type="radio"/> | <input type="radio"/> | g. Praise family members                                                                                | <input type="radio"/> | <input type="radio"/> |
| b. Enjoy fresh fruits & vegetables with family                             | <input type="radio"/> | <input type="radio"/> | h. Enjoy food with low fat, low sodium, low sugar and high fiber (“3 low 1 high” rule) with your family | <input type="radio"/> | <input type="radio"/> |
| c. Chat with family                                                        | <input type="radio"/> | <input type="radio"/> | i. Share happy experience with your family                                                              | <input type="radio"/> | <input type="radio"/> |
| d. Take time to walk or do exercise with family                            | <input type="radio"/> | <input type="radio"/> | j. Eat slowly with family                                                                               | <input type="radio"/> | <input type="radio"/> |
| e. Criticize family members less often                                     | <input type="radio"/> | <input type="radio"/> | k. Help to cook/ prepare/ clear /wash dishes                                                            | <input type="radio"/> | <input type="radio"/> |
| f. Encourage family members to be optimistic when facing unhappy incidents | <input type="radio"/> | <input type="radio"/> | l. Other (Please clarify):                                                                              |                       |                       |

**Part 14: Personal Background Information**

- 1 Gender: ① Male ② Female
- 2 Age: ① Below 18 ② 18-24 ③ 25-34 ④ 35-44  
⑤ 45-54 ⑥ 55-59 ⑦ 60-64 ⑧ 65 or above
- 3 Religious belief: ① Christianity ② Catholic ③ Buddhism ④ Taoism ⑤ Others: \_\_\_\_\_ ⑥ None

4 Where were you born? ① Hong Kong ② Guangdong Province ③ Other Province in China ④ Others: \_\_\_\_\_

5 How long have you lived in Hong Kong? ① 1 year or less ② 2-3 years ③ 4-6 years ④ 7 years or above

6 How many family members are living with you (excluding yourself & domestic helper)?

(fill in a number)

Page 6

7 Who is living with you?

- ① Spouse                      ② Children                      ③ Father                      ④ Mother                      ⑤ Siblings  
⑥ Grandfather/  
mother                      ⑦ Maternal  
grandfather/  
mother                      ⑧ Grand  
children                      ⑨ None                      ⑩ Other

8 How many children under 18 do you have? ① None ② 1 ③ 2 ④ 3 ⑤ 4 ⑥ 5 or above

9 How many family members are dependent on you for support (excluding yourself)?

- ① None                      ② 1                      ③ 2                      ④ 3  
⑤ 4                      ⑥ 5                      ⑦ 6 or above

10 Your education level:

- ① No formal education                      ② Primary                      ③ Secondary 1-3                      ④ Secondary 4-5  
⑤ Matriculated (Secondary 6-7)                      ⑥ Non-degree tertiary                      ⑦ Degree tertiary or above

11 Your working status:

- ① Student                      ② Self-employed                      ③ Employed                      ④ Job-waiting/  
Unemployed                      ⑤ Housewife                      ⑥ Retired

12 Your family income (monthly):

- ① Less than \$4,000                      ② \$4,000-\$7,999                      ③ \$8,000-\$9,999                      ④ \$10,000-\$14,999  
⑤ \$15,000-\$19,999                      ⑥ \$20,000-\$29,999                      ⑦ \$30,000 or above

13 You think your family financial status is:

- ① Enough with surplus                      ② Just enough                      ③ Need to reduce expenditure                      ④ Serious deficit

**End of the questionnaire! Thank you for your participation!**
