# Supplementary material for: A community based intervention program to enhance neighborhood cohesion: The Learning Families Project in Hong Kong
Source: PubMed Central journal article supplement (PMC5565197; doi:10.1371/journal.pone.0182722), 2017-08-21
Supplement: pone.0182722.s005.pdf [file pone.0182722.s005.pdf]

Name in Chinese: \_\_\_\_\_ Contact number: \_\_\_\_\_

## Learning Family Project Follow-up Survey

Date of questionnaire completion: \_\_\_\_ Year/ \_\_\_\_ Month/ \_\_\_\_ Day

Please answer **all questions** of each part, the information you provided will be kept **strictly confidential**, and will be used for research analysis of this project only.

Note: Please clearly put a "✓" on the selected circle. For example:  ①  ②  ③

1. From which of the following source you get this questionnaire?

- ① Mail box    ② Mutual Aid Committee    ③ Block counter    ④ Housing Authority    ⑤ Activity of Learning Family Project  
⑥ Other, please specify: \_\_\_\_\_

### Part 1: Family Harmony

1 In general, I get along well with my family.

① Strongly agree

② Agree

③ Neutral/ No comments

④ Disagree

⑤ Strongly disagree

2 Do you think **your family is harmonious**?

(Please circle a number to indicate your level of family harmony, 0 is NOT AT ALL HARMONIOUS, 10 is VERY HARMONIOUS)

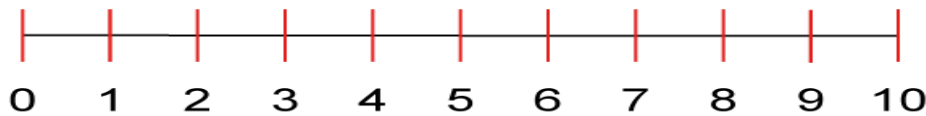

NOT AT ALL HARMONIOUS ← Average → VERY HARMONIOUS

### Part 2: Family Role

1 Are you satisfied or dissatisfied with the balance between your job and home life?

- ① Yes    ② No

2. Number of family roles for which you were mostly or fully responsible, including: earning money to support the family; taking care of children; taking care of another household (for example: (maternal) grandparents)

① 1      ② 2      ③ 3      ④ 4 or above

**Part 3: Family Communication**

1 In the past 7 days, how long have you spent on average per day to communicate or chat with your family?

Hour  Minute (fill in a number)

2 Do you think you have enough communication time with your family?

① Extremely enough      ② Enough      ③ Average      ④ Not enough      ⑤ Extremely not enough

**Part 4: Interpersonal Relationships and Support**

1 How many friends do you feel at ease with, can talk to about private matters, or can call on for help?

(fill in a number)

2 How many family members do you feel at ease with, can talk to about private matters, or can call on for help?

(fill in a number)

**Part 5: Social Support**

1 When you were sick, need help with household task, financial support, or get to the doctor, do you find it easy to seek for the help from family or friends?

① Very difficult      ② Difficult      ③ Average      ④ Easy      ⑤ Very Easy

2 How many people you are in regular contact (including family, relatives, friends & neighbours)?

(fill in a number)

In the past ONE month, how frequent you were in regular contact with the following persons?

At least once per day      At least once a week      At least once a month      Never

|                   |   |   |   |   |
|-------------------|---|---|---|---|
| 3 family members: | ① | ② | ③ | ④ |
| 4 relatives:      | ① | ② | ③ | ④ |
| 5 friends:        | ① | ② | ③ | ④ |
| 6 neighbours:     | ① | ② | ③ | ④ |

Are you satisfied with...      Very dissatisfied      Dissatisfied      Average      Satisfied      Very satisfied

|                                           |   |   |   |   |   |
|-------------------------------------------|---|---|---|---|---|
| 7 support received from family members?   | ① | ② | ③ | ④ | ⑤ |
| 8 support received from your relatives?   | ① | ② | ③ | ④ | ⑤ |
| 9 support received from your friends?     | ① | ② | ③ | ④ | ⑤ |
| 10 support received from your neighbours? | ① | ② | ③ | ④ | ⑤ |

**Part 6: Neighbourhood Cohesion**

|                                                                            |                |       |         |          |                   |
|----------------------------------------------------------------------------|----------------|-------|---------|----------|-------------------|
|                                                                            | Strongly agree | Agree | Neutral | Disagree | Strongly disagree |
| 1 People around here are willing to help their neighbours.                 | ①              | ②     | ③       | ④        | ⑤                 |
| 2 This is a close-knit neighbourhood.                                      | ①              | ②     | ③       | ④        | ⑤                 |
| 3 People in this neighbourhood can be trusted.                             | ①              | ②     | ③       | ④        | ⑤                 |
| 4 People in this neighbourhood generally do not get along with each other. | ①              | ②     | ③       | ④        | ⑤                 |
| 5 People in this neighbourhood do not share the same values.               |                |       |         |          |                   |

**Part 7: Life Satisfaction Scale**

|  |                   |          |         |       |                |
|--|-------------------|----------|---------|-------|----------------|
|  | Strongly disagree | Disagree | Neutral | Agree | Strongly agree |
|  | ①                 | ②        | ③       | ④     | ⑤              |
|  | ①                 | ②        | ③       | ④     | ⑤              |

- 1 In most ways my life is close to my ideal. ① ② ③ ④ ⑤
- 2 The conditions of my life are excellent. ① ② ③ ④ ⑤
- 3 I am satisfied with my life.
- 4 So far I have gotten the important things I want in life.
- 5 During the past half year, have you thought of quitting your job? ① Yes ② No ③ Not applicable
- 6 Marital status: ① Single ② Married ③ Cohabitation ④ Divorced ⑤ Separated ⑥ Widowed

If you are **married**, please answer the following two questions:

- |                                                                               | Strongly disagree | Disagree | Neutral | Agree | Strongly agree |
|-------------------------------------------------------------------------------|-------------------|----------|---------|-------|----------------|
| 6.1 Our relationship is a perfect success.                                    | ①                 | ②        | ③       | ④     | ⑤              |
| 6.2 I am very happy with how we handle role responsibilities in our marriage. | ①                 | ②        | ③       | ④     | ⑤              |

**Part 8: Level of Happiness**

- 1 All things considered, would you say you are: ① Very Happy ② Happy ③ Not very happy ④ Not happy at all

2 Do you think **your family is happy**?

(Please circle a number to indicate your level of family **happiness**, 0 is NOT HAPPY, 10 is VERY HAPPY)

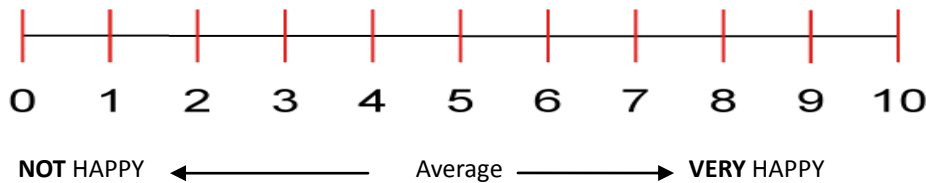

**Part 9: Level of Health**

- 1 In general, you think your health status is: ①Excellent ②Very good ③Good ④Fair ⑤ Bad

2 In physical health aspect:

- ① Strongly unsatisfactory ② Very unsatisfactory ③ Unsatisfactory ④ Average ⑤ Satisfactory ⑥ Very satisfactory ⑦ Strongly satisfactory

3 In mental and psychological health aspect:

- ① Strongly unsatisfactory ② Very unsatisfactory ③ Unsatisfactory ④ Average ⑤ Satisfactory ⑥ Very satisfactory ⑦ Strongly satisfactory

4 Do you think **your family is healthy**?

(Please circle a number to indicate your level of family **health**, 0 is NOT HEALTHY, 10 is VERY HEALTHY)

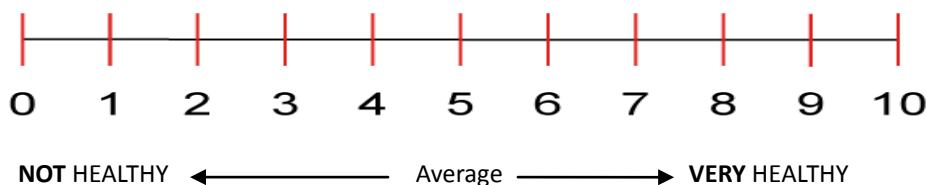

5. Do you smoke cigarettes?

① No, I have never tried to smoke

② No, I have quitted smoking for 6 months or below

③ No, I have quitted smoking for more than 6 months

(↪ go to q8)

④ Yes, I smoke daily

⑤ Yes, I smoke occasionally

If you are a smoker, please fill in the following three questions:

6. Are you thinking of quitting smoking?

① Yes (↪ continue with q7)

② No (↪ go to q8)

7. When do you want to quit smoking? (choose 1 only)

① I have already stopped

② I will stop smoking today

③ I will stop within the next 7 days

④ I will stop in the next 30 days

⑤ I will stop in the next 6 months

⑥ I will stop after 6 months or later

8. How frequent do you drink alcohol (e.g. 1 can of beer, 1 glass of house wine or 1 peg of liquor)?

① Never

② Drink less than once a month

③ Drink 1 – 3 days **a month**

④ Drink 1 – 3 days **a week**

⑤ Drink 4 – 6 days a week

⑥ Drink daily

⑦ Quitted

⑧ Only drink on special occasions

### **Part 10: Power, Participation and Resources in Community**

|                                                                                                  | Strongly disagree | Disagree | Neutral | Agree | Strongly agree |
|--------------------------------------------------------------------------------------------------|-------------------|----------|---------|-------|----------------|
| 1 I can influence the decisions that this community makes.                                       | ①                 | ②        | ③       | ④     | ⑤              |
| 2 By working together, people in my community can influence decisions that affect the community. | ①                 | ②        | ③       | ④     | ⑤              |
| 3 People in my community work together to influence decisions on the societal level.             | ①                 | ②        | ③       | ④     | ⑤              |
| 4 I am satisfied with the amount of influence I have over decisions that affect my community.    | ①                 | ②        | ③       | ④     | ⑤              |

5 Have you participated in the activities held in your estate? ① Seldom ② Occasionally ③ Sometimes ④ Most of the time ⑤ Always

6 Do you have volunteer work?

① Yes

② No

7 Do you think the resources in your community are enough (such as transport facilities, recreation facility, shopping and leisure, etc.)?

① Enough

② Not enough

8 Have you used the service provided by the social service organization in your community?

① Yes

② No

### **Part 11: Family Resilience Scale**

| My family and I think that...                          | Strongly agree | Agree | Slightly agree | Neutral | Slightly disagree | Disagree | Strongly disagree |
|--------------------------------------------------------|----------------|-------|----------------|---------|-------------------|----------|-------------------|
| 1 We all have input into major family decisions.       | ①              | ②     | ③              | ④       | ⑤                 | ⑥        | ⑦                 |
| 2 We can work through difficulties as a family.        | ①              | ②     | ③              | ④       | ⑤                 | ⑥        | ⑦                 |
| 3 We feel free to express our opinions.                | ①              | ②     | ③              | ④       | ⑤                 | ⑥        | ⑦                 |
| 4 We share responsibility in the family.               | ①              | ②     | ③              | ④       | ⑤                 | ⑥        | ⑦                 |
| 5 We ask neighbours for help and assistance.           | ①              | ②     | ③              | ④       | ⑤                 | ⑥        | ⑦                 |
| 6 We can depend upon people in this community.         | ①              | ②     | ③              | ④       | ⑤                 | ⑥        | ⑦                 |
| 7 We know there is community help if there is trouble. | ①              | ②     | ③              | ④       | ⑤                 | ⑥        | ⑦                 |
| 8 We know we are important to our friends.             | ①              | ②     | ③              | ④       | ⑤                 | ⑥        | ⑦                 |
| 9 We feel we are strong in facing big problems.        | ①              | ②     | ③              | ④       | ⑤                 | ⑥        | ⑦                 |

### **Part 12: Family 3Hs – Health, Happiness and Harmony**

**In the past 7 days**, have you actively done the following(s) to increase the 3Hs (Health, Happiness and Harmony) in your family? (You can choose more than one)

|                                                                            | Yes                   | No                    |                                                                                                         | Yes                   | No                    |
|----------------------------------------------------------------------------|-----------------------|-----------------------|---------------------------------------------------------------------------------------------------------|-----------------------|-----------------------|
| a. Say thank you to family members                                         | <input type="radio"/> | <input type="radio"/> | g. Praise family members                                                                                | <input type="radio"/> | <input type="radio"/> |
| b. Enjoy fresh fruits & vegetables with family                             | <input type="radio"/> | <input type="radio"/> | h. Enjoy food with low fat, low sodium, low sugar and high fiber ("3 low 1 high" rule) with your family | <input type="radio"/> | <input type="radio"/> |
| c. Chat with family                                                        | <input type="radio"/> | <input type="radio"/> | i. Share happy experience with your family                                                              | <input type="radio"/> | <input type="radio"/> |
| d. Take time to walk or do exercise with family                            | <input type="radio"/> | <input type="radio"/> | j. Eat slowly with family                                                                               | <input type="radio"/> | <input type="radio"/> |
| e. Criticize family members less often                                     | <input type="radio"/> | <input type="radio"/> | k. Help to cook/ prepare/ clear /wash dishes                                                            | <input type="radio"/> | <input type="radio"/> |
| f. Encourage family members to be optimistic when facing unhappy incidents | <input type="radio"/> | <input type="radio"/> | l. Other (Please clarify):                                                                              |                       |                       |

### Part 13 : Overall

| <u>In the past one year</u> , have you?                                                                                                                       | Yes | No |
|---------------------------------------------------------------------------------------------------------------------------------------------------------------|-----|----|
| 1 participated in the activities of <b>FAMILY: A Jockey Club Initiative for a Harmonious Society</b> ?                                                        | ①   | ②  |
| 2 participated in the activities of <b>Learning Family Project</b> ?                                                                                          | ①   | ②  |
| 3 implemented the suggestions from the "Learning Family Project"?                                                                                             | ①   | ②  |
| 4 used the Learning Family Booklet distributed during activities ?                                                                                            | ①   | ②  |
| 5 learnt together with family members (E.g. outdoor activities, competitions, environment education, family life education, interest class, language course)? | ①   | ②  |

6 Are you intend to start learning with family member?

①next 1-3 months ② next 4-6 months ③No intention to start

### Part 14: Personal Background Information

1 Gender: ①Male ②Female

2 Age: \_\_\_\_\_ (please specify your age, or choose from the below answer)

①Below 18 ②18-24 ③25-34 ④35-44  
⑤45-54 ⑥55-59 ⑦60-64 ⑧65 or above

3 Religious belief: ① Christianity ② Catholic ③Buddhism ④Taoism ⑤Others: \_\_\_\_\_ ⑥None

4 Where were you born? ①Hong Kong ② Guangdong Province ③Other Province in China ④Others: \_\_\_\_\_

5 How long have you lived in Hong Kong? ①1 year or less ②2-3 years ③ 4-6 years ④7 years or above

6 How many family members are living with you (excluding yourself & domestic helper)?  (fill in a number)

7 Who is living with you? ① Spouse ② Children ③ Father ④ Mother ⑤ Siblings  
⑥ Grandfather/mother ⑦ Maternal grandfather/mother ⑧ Grand children ⑨ None ⑩ Other

8 How many children under 18 do you have? ① None ② 1 ③ 2 ④ 3 ⑤ 4 ⑥ 5 or above

9 How many family members are dependent on you for support (excluding yourself)? ① None ② 1 ③ 2 ④ 3  
⑤ 4 ⑥ 5 ⑦ 6 or above

10 Your education level: ① No formal education ② Primary ③ Secondary 1-3 ④ Secondary 4-5  
⑤ Matriculated (Secondary 6-7) ⑥ Non-degree tertiary ⑦ Degree tertiary or above

11 Your working status: ① Student ② Self-employed ③ Employed ④ Job-waiting/Unemployed ⑤ Housewife ⑥ Retired

12 Your family income (monthly): ① Less than \$4,000 ② \$4,000-\$7,999 ③ \$8,000-\$9,999 ④ \$10,000-\$14,999  
⑤ \$15,000-\$19,999 ⑥ \$20,000-\$29,999 ⑦ \$30,000 or above

13 You think your family financial status is: ① Enough with surplus ② Just enough ③ Need to reduce expenditure ④ Serious deficit

**End of the questionnaire! Thank you for your participation!**
